# Supplementary figures and images for: PIGNet: a physics-informed deep learning model toward generalized drug–target interaction predictions
Source: Royal Society of Chemistry journal article supplement (doi:10.1039/d1sc06946b), 2022-01-01

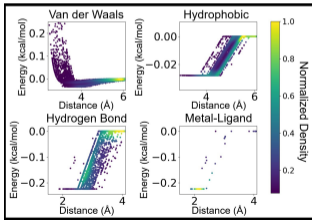

Supplement: d1sc06946b1.pdf [file d1sc06946b1.pdf]
